# Supplementary material for: Development of thermally stable red-emitting lead-free double-perovskite phosphors with an internal PLQY approaching 100%
Source: Royal Society of Chemistry journal article supplement (doi:10.1039/d3dt03271j), 2023-11-28
Supplement: d3dt03271j1.pdf [file d3dt03271j1.pdf]

## Supporting Information

### Development of thermally-stable red-emitting lead-free double-perovskite phosphors with an internal PLQY approaching 100%

Hong Li<sup>a</sup>, Li Li<sup>a\*</sup>, Lingsong Mei<sup>a</sup>, Wei Zhao<sup>a</sup>, Xianju Zhou<sup>a</sup>, Yongbin Hua<sup>b</sup>, Jae Su Yu<sup>b\*</sup>

<sup>a</sup>*School of Science, Chongqing University of Posts and Telecommunications, Chongqing, 400065, P. R. China*

<sup>b</sup>*Department of Electronics and Information Convergence Engineering, Institute for Wearable Convergence Electronics, Kyung Hee University, Yongin-si, Gyeonggi-do 17104, Republic of Korea*

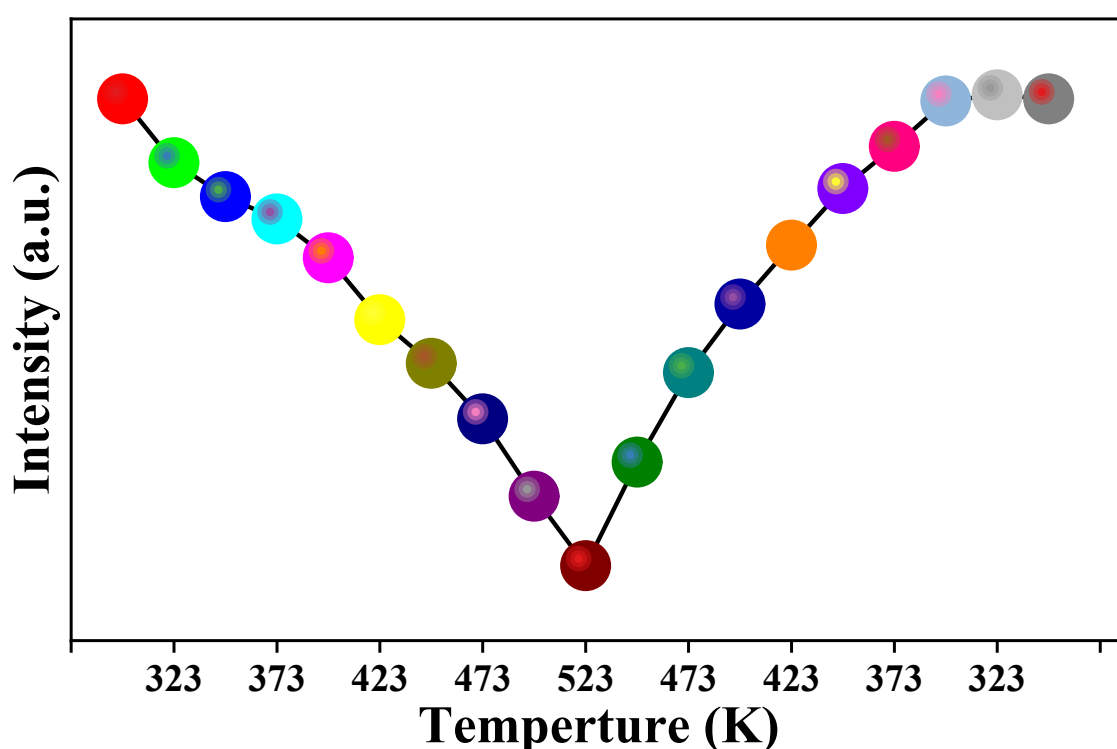

Fig. S1. The thermal cycle measurement of CSTO: 0.4Eu<sup>3+</sup> phosphors.

\*Corresponding author. Li Li; E-mail: [lilic@cqupt.edu.cn](mailto:lilic@cqupt.edu.cn). Jae Su Yu; E-mail: [jsyu@khu.ac.kr](mailto:jsyu@khu.ac.kr).

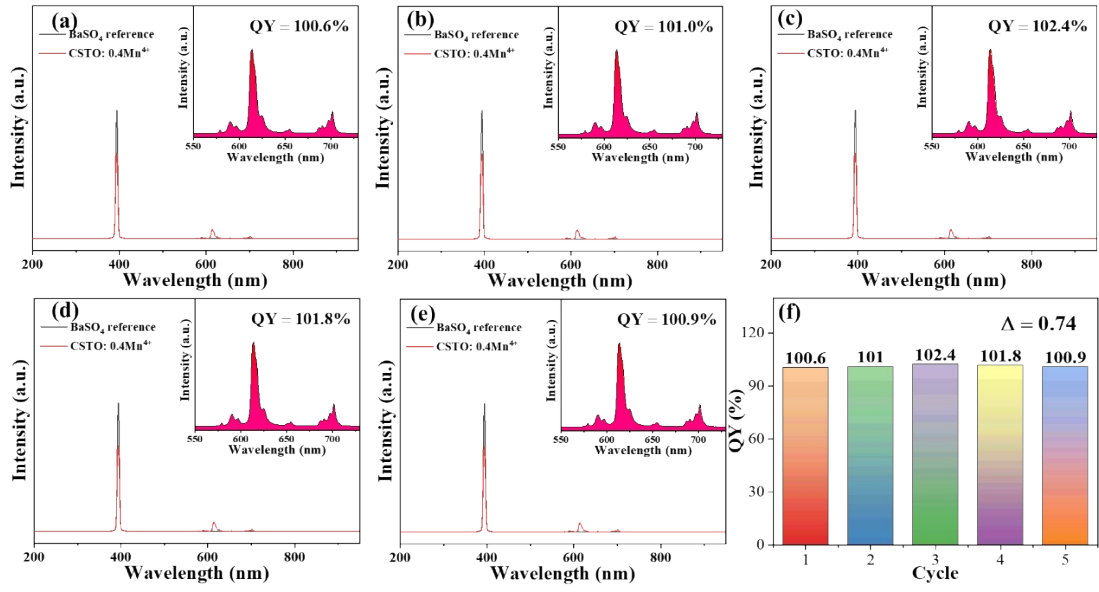

**Fig. S2.** Excitation line of BaSO<sub>4</sub> reference and PL QY measurement of the synthesized CSTO: 0.4Eu<sup>3+</sup> phosphors under the (a) 1, (b) 2, (c) 3, (d) 4, and (e) 5 cycle. All insets show a sample enlarged emission spectrum in 550-730 nm range in corresponding cycle. (f) the PL QY values of 1-5 cycles.

## Verification report for PLQY

FOUNDATION FOR INDUSTRY COOPERATION. UNIVERSITY OF ULSAN

NO. 2023-0001

### Total-period Analysis Center for Ulsan Chemical Industry (TACU)

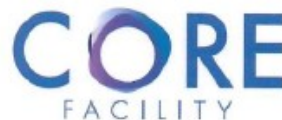

Address : (44776) 12, Technosaneop-ro 55beon-gil, Nam-gu, Ulsan, Korea. Tel. +82 52-712-8028

# TEST REPORT

1. Client  
Company : KyungHee University  
Address : 1732, Deogyong-daero, Giheung-gu, Yongin-si, Gyeonggi-do 17104, Republic of Korea
2. Date of Receipt : Jun.05.2023
3. Subject of Test : Quantum Yield measurement  
Sample Name : 1
4. Test Methods : Excitation wavelength dependence of quantum yield  
Model : Hamamatsu Photonics / C11347-1
5. Test Completion Date : Jun.15.2023
6. Test Result : Attachment

2023. 06. 21

### Total-Period Analysis Center for Ulsan Chemical Industry

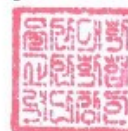

Note1. The test results of this test report are only limited in to the samples and sample names provided by the client and do not guarantee the quality of all products of the client.

Note2. This test report shall be used only within the purpose of its defined usage and shall not be used for public relation, advertisement and lawsuit without approval of TACU

## Total-period Analysis Center for Ulsan Chemical Industry (TACU)

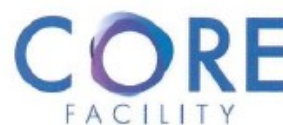

Address : (44776) 12, Technosaneop-ro 55beon-gil, Nam-gu, Ulsan, Korea. Tel. +82 52-712-8028

### # Test Result

| No. | Cursor1-2(383.52-404.70nm) | Cursor3-4(489.10-915.76nm) | Quantum Yield | Abs   |
|-----|----------------------------|----------------------------|---------------|-------|
| 1   | 133610051                  | ---                        | ---           | ---   |
| 2   | 96527482                   | 37319981                   | 1.006         | 0.278 |
| 3   | 96491080                   | 37503115                   | 1.010         | 0.278 |
| 4   | 96587192                   | 37690054                   | 1.018         | 0.277 |
| 5   | 96487157                   | 37458687                   | 1.009         | 0.278 |
| 6   | 96505006                   | 38000232                   | 1.024         | 0.278 |

| Peak Wavelength | Peak Count | Peak FWHM | Peak Wavelength | Peak Count | Peak FWHM |
|-----------------|------------|-----------|-----------------|------------|-----------|
| 394.12          | 55226.59   | 5.82      | 882.28          | 22.04      | 1.25      |
| 394.12          | 36565.10   | 6.39      | 614.03          | 3995.77    | 8.27      |
| 394.12          | 36479.63   | 6.40      | 614.03          | 3985.00    | 8.29      |
| 394.12          | 36564.21   | 6.39      | 614.03          | 3981.97    | 8.29      |
| 394.12          | 36542.90   | 6.39      | 614.03          | 3968.89    | 8.31      |
| 394.12          | 36520.70   | 6.40      | 614.03          | 3971.74    | 8.30      |

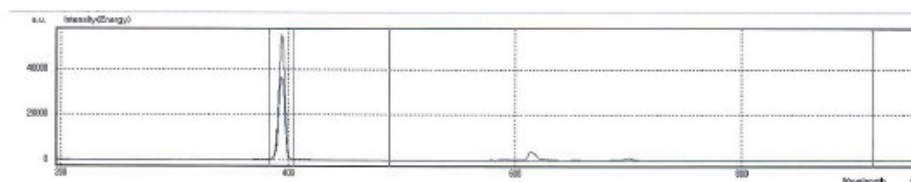

## Total-Period Analysis Center for Ulsan Chemical Industry

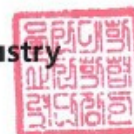

Note1. The test results of this test report are only limited in to the samples and sample names provided by the client and do not guarantee the quality of all products of the client.

Note2. This test report shall be used only within the purpose of its defined usage and shall not be used for public relation, advertisement and lawsuit without approval of TACU
